# Supplementary material for: Highly flexible all-solid-state cable-type supercapacitors based on Cu/reduced graphene oxide/manganese dioxide fibers
Source: Royal Society of Chemistry journal article supplement (doi:10.1039/c6ra28117f), 2017-01-01
Supplement: c6ra28117f1.pdf [file c6ra28117f1.pdf]

## Electronic Supplementary Information

### **Highly flexible all-solid-state cable-type supercapacitors based Cu/reduced graphene oxide/manganese dioxide fibers**

Miaomiao Huang, Lu Wang, Shuangbao Chen, Liping Kang, Zhibin Lei, Feng Shi,

Hua Xu, Zong-Huai Liu\*

*Key Laboratory of Applied Surface and Colloid Chemistry (Shaanxi Normal University), Ministry of Education, Xi'an, 710062, P. R. China; Shaanxi Key Laboratory for Advanced Energy Devices; Xi'an, 710119, P. R. China; School of Materials Science and Engineering, Shaanxi Normal University, Xi'an, 710119, P. R. China*

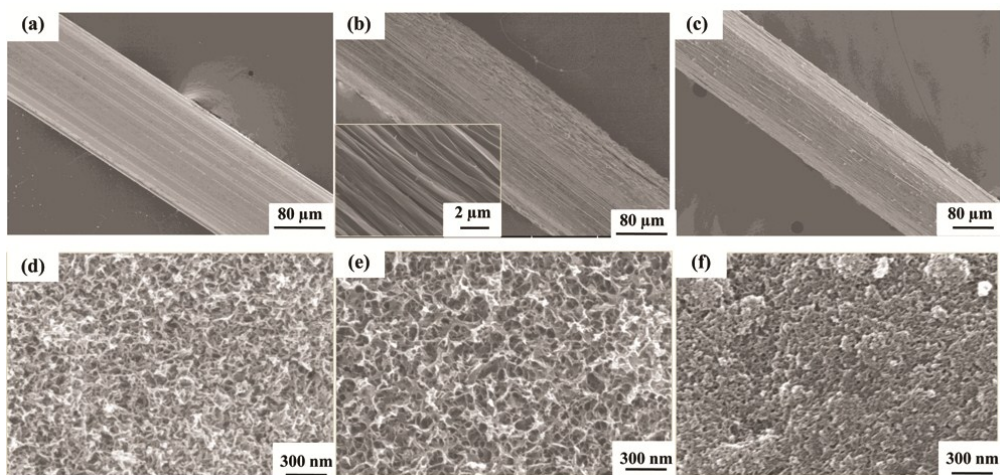

Figure S1. FE-SEM images of the obtained Cu wire (a), Cu/RGO fiber (b), Cu/RGO/MnO<sub>2</sub> fiber (c), and Cu/RGO/MnO<sub>2</sub> fibers coated with different MnO<sub>2</sub> amounts (d-f).

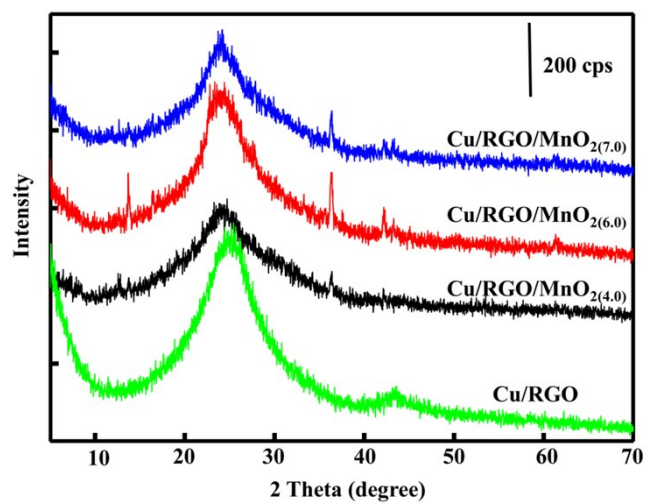

**Figure S2.** XRD patterns of the obtained Cu/RGO and Cu/RGO/MnO<sub>2</sub> fibers coated with different MnO<sub>2</sub> amounts.

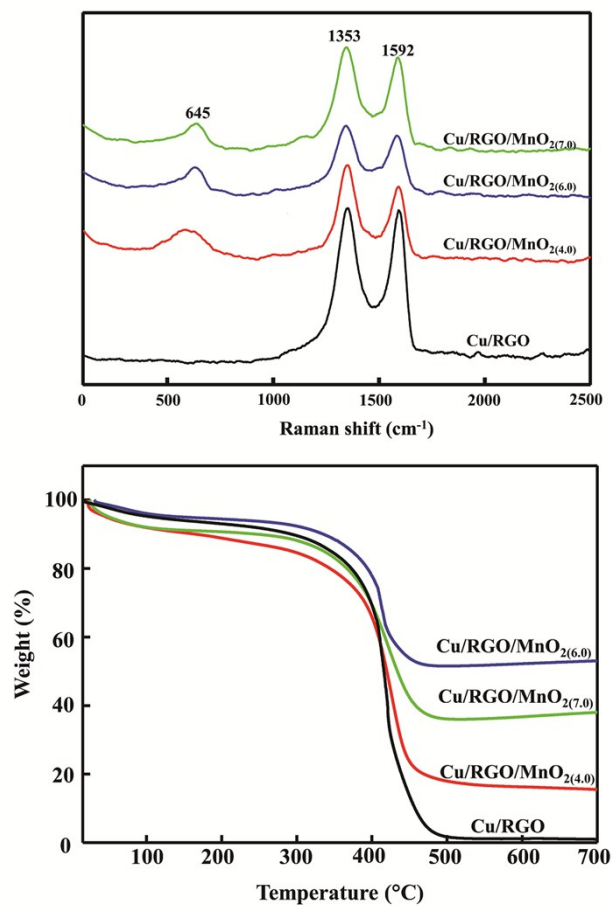

Figure S3. Raman spectra (above) and TG-DTA curves (below) of Cu/RGO fiber and Cu/RGO/MnO<sub>2</sub> fibers coated with different MnO<sub>2</sub> amounts.

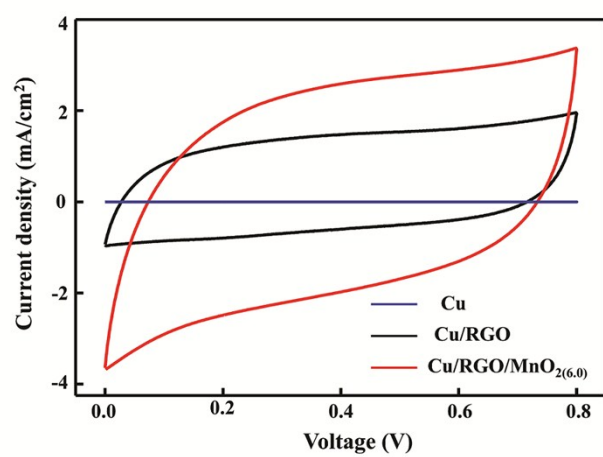

**Figure S4** CV curves of Cu wire, Cu/RGO fiber, and Cu/RGO/MnO<sub>2(6.0)</sub> all-solid-state fiber supercapacitors at a scan rate of 20 mV s<sup>-1</sup>.

**Table S1 The capacitance compare of the Cu/RGO/MnO<sub>2(6.0)</sub> fiber supercapacitor with other reported references.**

| Electrode material             | Electrolyte                        | Capacitance (mF cm <sup>-2</sup> ) | Curent density            | Cycle life           | Ref.      |
|--------------------------------|------------------------------------|------------------------------------|---------------------------|----------------------|-----------|
| GF                             | PVA-H <sub>3</sub> PO <sub>4</sub> | 3.3                                | 0.1 mA cm <sup>-2</sup>   | 100% for 5000 cycles | [1]       |
| GF/3D-G                        | PVA-H <sub>2</sub> SO <sub>4</sub> | 1.7                                | 424.6 μA cm <sup>-2</sup> | /                    | [2]       |
| δ-MnO <sub>2</sub> /HRGO       | PVA-H <sub>3</sub> PO <sub>4</sub> | 16.7                               | 0.1 mA cm <sup>-2</sup>   | 80% for 1000 cycles  | [3]       |
| MnO <sub>2</sub> /G/GF         | PVA-H <sub>2</sub> SO <sub>4</sub> | 9.6                                | /                         | 100% for 1000 cycles | [4]       |
| MnO <sub>2</sub> /CNT          | PVA-KOH                            | 33.75                              | 5 mV s <sup>-1</sup>      | 99% for 10000 cycles | [5]       |
| MnO <sub>2</sub> /CNT          | PVA-KOH                            | 60.43                              | 10 mV s <sup>-1</sup>     | 100% for 5000 cycles | [6]       |
| MnO <sub>2</sub> /CNT          | PVA-LiCl                           | 61.25                              | 10 mV s <sup>-1</sup>     | /                    | [7]       |
| Ti@MnO <sub>2</sub>            | PVA-LiCl                           | 15.6                               | 0.03 mA cm <sup>-2</sup>  | 80% for 5000 cycles  | [8]       |
| MnO <sub>2</sub> /carbon fiber | PVA-LiCl                           | 87.1 F g <sup>-1</sup>             | 1.25 A g <sup>-1</sup>    | 95% for 3000 cycles  | [9]       |
| Graphene/CNT                   | PVA-H <sub>3</sub> PO <sub>4</sub> | 4.97                               | 0.9 mA cm <sup>-2</sup>   | 100% for 5000 cycles | [10]      |
| Cu/RGO/MnO <sub>2</sub>        | PVA-KOH                            | 140                                | 0.1 mA cm <sup>-2</sup>   | 88% for 5000 cycles  | This work |

## References

1. T. Huang, B. Zheng, L. Kou, K. Gopalsamy, Z. Xu, C. Gao, Y. Meng and Z. Wei, *RSC Adv.*, 2013, **3**, 23957-23962.
2. Y. Meng, Y. Zhao, C. Hu, H. Cheng, Y. Hu, Z. Zhang, G. Shi and L. Qu, *Adv. Mater.*, 2013, **25**, 2326-2331.
3. W. Ma, S. Chen, S. Yang, W. Chen, Y. Cheng, Y. Guo, S. Peng, S. Ramakrishna and M. Zhu, *J. Power Sources*, 2016, **306**, 481-488.
4. Q. Chen, Y. Meng, C. Hu, Y. Zhao, H. Shao, N. Chen and L. Qu, *J. Power Sources*, 2014, **247**, 32-39.
5. P. Xu, B. Wei, Z. Cao, J. Zheng, K. Gong, F. Li, J. Yu, Q. Li, W. Lu and J.H. Byun, *ACS Nano*, 2015, **9**, 6088-6096.
6. J. Yu, W. Lu, J.P. Smith, K.S. Booksh, L.Meng, Y. Huang, Q. Li, J.H. Byun, Y. Oh, Y. Yan and T.W. Chou, *Adv. Energy Mater.*, 2016, DOI: 10.1002/aenm.201600976.
7. C. Choi, H.J. Sim, G.M. Spinks, X. Lepró, R.H. Baughman and S.J. Kim, *Adv. Energy Mater.*, 2016, DOI: 10.1002/aenm.201502119.
8. K. Guo, Y. Ma, H. Li and T. Zhai, *Small*, 2016, **12**, 1024-1033.
9. N. Yu, H. Yin, W. Zhang, Y. Liu, Z. Tang and M.Q. Zhu, *Adv. Energy Mater.*, 2016, DOI: 10.1002/aenm.201501458
10. H. Sun, X. You, J. Deng, X. Chen, Z. Yang, J. Ren and H. Peng, *Adv. Mater.*, 2014, **26**, 2868-2873.
